# Supplementary material for: Maternal Diet, Nutritional Status, and Birth-Related Factors Influencing Offspring’s Bone Mineral Density: A Narrative Review of Observational, Cohort, and Randomized Controlled Trials
Source: MDPI journal article supplement (doi:10.3390/nu13072302), 2021-07-04
Supplement: s1 [file s1]

Review

# Maternal Diet, Nutritional Status, and Birth-Related Factors Influencing Offspring's Bone Mineral Density: A Narrative Review of Observational, Cohort, and Randomized Controlled Trials

Daria Masztalerz-Kozubek, Monika A. Zielinska-Pukos and Jadwiga Hamulka\*

**Table S1.** Detailed data about dietary assessment method, maternal dietary intake in pregnancy and type of data used for statistical analysis.

| Country, Year [Reference] | Maternal Dietary Intake Assessment (gestation) | Detailed Information about Dietary Assessment Method                                                                                               | Reported Maternal Dietary Intake                                                                                                                                                                                                                                                                                                                                                                                                                                                                                                                                                                                                                                                                                                                                                                                                                        | Data Used for Analysis                                     |
|---------------------------|------------------------------------------------|----------------------------------------------------------------------------------------------------------------------------------------------------|---------------------------------------------------------------------------------------------------------------------------------------------------------------------------------------------------------------------------------------------------------------------------------------------------------------------------------------------------------------------------------------------------------------------------------------------------------------------------------------------------------------------------------------------------------------------------------------------------------------------------------------------------------------------------------------------------------------------------------------------------------------------------------------------------------------------------------------------------------|------------------------------------------------------------|
| Netherlands, 2013 [19]    | FFQ (1 <sup>st</sup> trimester)                | Modified version of the validated semiquantitative FFQ by Klipstein-Grobusch, after validation [90]<br><br>293 food items in the previous 3 months | Energy 2152 ± 504 kcal<br>protein 78.5 ± 11.7 g/d; carbohydrate 236 ± 30 g/d; fat 73.6 ± 10.7 g/d; calcium 1108 ± 311 mg/d; phosphorus 1443 ± 241 mg/d; magnesium 339 ± 56 mg/d                                                                                                                                                                                                                                                                                                                                                                                                                                                                                                                                                                                                                                                                         | Quintiles of energy from macronutrients and mineral intake |
| UK, 2005 [32]             | FFQ (32 wk)                                    | Semiquantitative FFQ based on previous FFQ used in UK (without validation after modifications) [91]<br><br>75 food items in the previous 3 months  | Energy 7505 ± 1967 kJ<br>protein 67.7 ± 18 g/d; carbohydrate 223 ± 61.5 g/d; fiber 20.3 ± 6.31 g/d; starch 121 ± 36 g/d; sugar 102 ± 38 g/d; intrinsic/milk sugar 41.6 ± 12 g/d; extrinsic non-milk 60.6 ± 34 g/d; total fat 70.6 ± 22.7 g/d; saturates 28.9 ± 10.9 g/d; monounsaturates 24.8 ± 8.15 g/d; polyunsaturates 12.7 ± 5.75 g/d; omega-3 0.155 ± 0.146 g/d<br>calcium 952 ± 275 mg/d; phosphorus 1339 ± 338 mg/d; magnesium 261 ± 74.2 mg/d; potassium 2626 ± 636 mg/d; sodium 2239 ± 619 mg/d; total zinc 8.55 ± 2.31 mg/d; iron 10.8 ± 3.15 mg/d; retinol 490 ± 328 µg/d; riboflavin 1.73 ± 0.513 mg/d; carotene 2291 ± 1164 µg/d; folate 257 ± 69.6 µg/d; thiamin 1.46 ± 0.401 mg/d; niacin 16.3 ± 4.86 mg/d; vitamin B <sub>6</sub> 1.87 ± 0.502 mg/d; vitamin C 84.3 ± 33.8 mg/d; vitamin D 3.11 ± 1.45 µg/d; vitamin E 8.57 ± 4.35 mg/d | Quantitative data                                          |
| Australia, 2000 [20]      | FFQ (after birth)                              | Self-administered semiquantitative FFQ<br><br>179 food items in the 3 <sup>rd</sup> pregnancy trimester                                            | Energy 15398 ± 8675 kJ<br>protein 155 ± 94 g/d; carbohydrate 417 ± 231 g/d; fat 162 ± 101 g/d<br>calcium 1905 ± 1310 mg/d; phosphorus 2767 ± 1655 mg/d; magnesium 504 ± 280 mg/d; potassium 3084 ± 1042 mg/d                                                                                                                                                                                                                                                                                                                                                                                                                                                                                                                                                                                                                                            | Tertiles of density of selected nutrients                  |

|                      |                                   |                                                                                                           |                                                                                                                                                                                                                                                                                                                                                                                                                                                                                                                                                                                               |                                                                                                   |
|----------------------|-----------------------------------|-----------------------------------------------------------------------------------------------------------|-----------------------------------------------------------------------------------------------------------------------------------------------------------------------------------------------------------------------------------------------------------------------------------------------------------------------------------------------------------------------------------------------------------------------------------------------------------------------------------------------------------------------------------------------------------------------------------------------|---------------------------------------------------------------------------------------------------|
| Australia, 2010 [21] | FFQ (3 <sup>rd</sup> trimester)   | Self-administered semiquantitative FFQ<br>179 food items in the 3 <sup>rd</sup> pregnancy trimester       | Energy 13264 ± 4599 kJ; fat 162 ± 101 g/d<br>protein 128 ± 45 g/d; carbohydrate 375 ± 139 g/d<br>calcium 1677 ± 841 mg/d; phosphorus 2314 ± 898 mg/d; magnesium 429 ± 149 mg/d                                                                                                                                                                                                                                                                                                                                                                                                                | Quantitative data (density of selected nutrients)                                                 |
| UK, 2009 [33]        | FFQ (15, 32 wk)                   | Validated semiquantitative FFQ administered by nurse [92]<br>100 food items in the previous 3 months      | PDS in early pregnancy 0.14 ± 2.2; PDS in late pregnancy 0.26 ± 2.1<br>protein 84.7 (73 - 99.1) g/d<br>calcium 1230.1 (1019.6 - 1502.3) mg/d                                                                                                                                                                                                                                                                                                                                                                                                                                                  | Quantitative data (PDS)                                                                           |
| India, 2006 [24]     | FFQ and 24-h recall (18, 28 wk)   | Developed for this community and validated FFQ and 24-h recall [93]<br>111 items in the previous 3 months | Frequency of intake per month:<br>milk 18 and 28 wk 6 (0 - 16); milk products 18 wk 61 (36 - 66), 28 wk 61 (34 - 66); pulses 18 wk 52 (35 - 73), 28 wk 47 (31 - 69); fish, meat or eggs 18 wk 2 (0 - 8), 28 wk 1 (0 - 8); green leafy vegetables 18 wk 10 (5 - 21), 28 wk 6 (2 - 14); fruit 18 wk 28 (14 - 47), 28 wk 20 (10 - 37); all calcium-rich 18 wk 145 (109 - 182), 28 wk 134 (103 - 169)<br>calcium 18 wk 274 (223 - 354), 28 wk 268 (208 - 332) mg/d; phosphorus 18 wk 1033 (911 - 1120), 28 wk 1016 (890 - 1174) mg/d; magnesium 18 wk 477 (416 - 548), 28 wk 477 (416 - 545) mg/d | Quantitative data (frequency of intake)                                                           |
| UK, 2001 [31]        | FFQ (in early and late pregnancy) | Validated semiquantitative FFQ administered by nurse [92]<br>100 food items in the previous 3 months      | Energy 14.7 wk 2293 (1868 - 2862) kcal/d, 28 wk 2551 (2140 - 3121) kcal/d<br>green vegetable intake 14.7 wk 6.7 (4.4 - 10.0) portions/wk, 28 wk 6.2 (3.5 - 9.0) portions/wk<br>calcium 14.7 wk 1183 (983 - 1554) mg/d, 28 wk 1320 (1049 - 1665) mg/d                                                                                                                                                                                                                                                                                                                                          | Quantitative data after log-transformation (calcium and green leafy vegetables)                   |
| Australia, 2017 [30] | FFQ (28-32 wk)                    | Validated Victorian Cancer Council FFQ [94]<br>100 food items in the previous 12 months                   | Energy 7831 (6506 - 9327) kJ/d<br>protein 84.7 (69.7 - 102.3) g/d<br>calcium 1022.5 (816.6 - 1256.3) mg/d; phosphorus 1515.3 (1241.2 - 1823.6) mg/d;<br>magnesium 278.2 (228.0 - 338.8) mg/d; potassium 2859.6 (2359.6 - 3436.7) mg/d;<br>zinc 10.9 (8.8 - 13.3) mg/d                                                                                                                                                                                                                                                                                                                         | Quantitative data after log-transformation (per 100 g protein; per 100 mg minerals and 1 µg zinc) |

E, energy; FFQ, food frequency questionnaire; PDS, prudent diet score; m, months; wk, week; data presented as mean values ± standard deviations or medians (interquartile range).

Table S2. Gestational age and offspring bone outcomes

| Country, Year<br>[Reference] | Study Details                                                |                                      |                                           |                                                                                | Outcome<br>no effect/association (↔)<br>positive (↑)<br>negative (↓) |
|------------------------------|--------------------------------------------------------------|--------------------------------------|-------------------------------------------|--------------------------------------------------------------------------------|----------------------------------------------------------------------|
|                              | Study Subjects                                               | Study Design                         | Assessment<br>Method (age)                | Parameters                                                                     |                                                                      |
| UK, 2001 [31]                | F=64<br>M=81<br>(neonates)                                   | Cohort study                         | DXA<br>(2 d**; 0-13 d)                    | WB and spine BMD                                                               | WB, spine BMD (↑)                                                    |
| China, 2010 [42]             | F=119<br>M=148<br>(neonates)                                 | Cross-sectional study                | QUS<br>(2.9 d*)                           | SOS                                                                            | SOS (↑)                                                              |
| USA, 2003 [62]               | F=50<br>M=45<br>(neonates; PT <37 wk)                        | Prospective study                    | QUS<br>(within the first<br>10 d of life) | SOS                                                                            | SOS (↑)                                                              |
| Netherlands, 2014 [10]       | F=2732<br>M=2718<br>(6 y**)                                  | Prospective cohort study             | DXA<br>(6 y**)                            | WB/WBLH BMD                                                                    | WB/WBLH BMD (↔)                                                      |
| India, 2006 [24]             | F=326<br>M=369<br>6.2 y**                                    | Prospective cohort study<br>(PMNS)   | DXA<br>(6.2 y**)                          | TB and total spine BMD                                                         | TB and total spine BMD (↔)                                           |
| USA, 2009 [60]               | M=24<br>6.9-7.4 y*<br>(FT >37 wk, LP 34-37 wk, PT ≤34 wk)    | Cross-sectional study                | DXA, pQCT<br>(6.9-7.4 y*)                 | DXA: hip, spine, FN aBMD<br>pQCT: distal tibia cortical and<br>trabecular vBMD | FT vs PT:<br>hip aBMD (↑)<br>FT vs LP:<br>FN, hip aBMD (↑)           |
| Turkey, 2020 [77]            | F=79<br>M=87<br>(PT <37 wk– 7.5 y*;<br>term ≥37 wk – 7.6 y*) | Prospective<br>cross-sectional study | DXA<br>(7.5-7.6 y*)                       | WB, LS, femoral BMD                                                            | PT vs term:<br>WB BMD, LS BMD, femoral BMD<br>(↓)                    |

aBMD, areal bone mineral density; BMD, bone mineral density; vBMD, volumetric bone mineral density; DXA, Dual Energy X-ray Absorptiometry; FN, femoral neck; FT, full-term; LP, late preterm; LS, lumbar spine; PMNS, Pune Maternal Nutrition Study; PT, preterm; pQCT, peripheral Quantitative Computed Tomography; SOS, speed of sound; TB, total body; WB, whole body; WBLH, whole body less head; QUS, Quantitative Ultrasound; F, female; M, male; \*mean, \*\*median; wk, week (gestation); y, years

**Table S3.** Summary of included studies

| Factor                                | Number of Included Studies [Reference]      |                                   |                             |                          |
|---------------------------------------|---------------------------------------------|-----------------------------------|-----------------------------|--------------------------|
|                                       | Total                                       | Positive Effect/Association       | Negative Effect/Association | No Effect/Association    |
| <b>Maternal</b>                       |                                             |                                   |                             |                          |
| Dietary intake in pregnancy           | 8<br>[19–21,24,30–33]                       | 7<br>[19–21,24,31–33]             | 3<br>[19,21,31]             | 1<br>[30]                |
| Dietary intervention studies          | 7<br>[11–16,34]                             | 1<br>[13]                         | 0                           | 6<br>[11,12,14–16,34]    |
| Vitamin D status in pregnancy         | 11<br>[17,18,23,35–42]                      | 5<br>[17,18,40–42]                | 0                           | 6<br>[23,35–39]          |
| Other nutrients status                | 6<br>[18,19,22–24,43]                       | 5<br>[18,19,22–24]                | 0                           | 1<br>[43]                |
| Anthropometry                         | 7<br>[24,31,52–56]                          | 4<br>[31,53,55,56]                | 1<br>[53]                   | 3<br>[24,52,54]          |
| Prepregnancy weight                   | 4<br>[54,57,58,59]                          | 1<br>[54]                         | 0                           | 3<br>[57,58,59]          |
| Demographic and socioeconomic factors | 6<br>[24,52,54,60,61,62]                    | 1<br>[61]                         | 1<br>[54]                   | 4<br>[24,52,60,62]       |
| Smoking in pregnancy                  | 8<br>[31,52,54,63–67]                       | 0                                 | 1<br>[31]                   | 7<br>[52,54,63–67]       |
| <b>Birth-related</b>                  |                                             |                                   |                             |                          |
| Birth anthropometry                   | 15<br>[10,23,24,31,42,53,54,56,62–65,70–72] | 9<br>[10,31,42,53,56,62,65,70,71] | 0                           | 6<br>[23,24,54,63,64,72] |
| Gestational age                       | 7<br>[10,24,31,42,60,62,77]                 | 5<br>[31,42,60,62,77]             | 0                           | 2<br>[10,24]             |
